# Supplementary material for: Genetic Influences on Translation in Yeast
Source: PubMed Central journal article supplement (PMC4207643; doi:10.1371/journal.pgen.1004692), 2014-10-23

**A**

McManus Hybrid

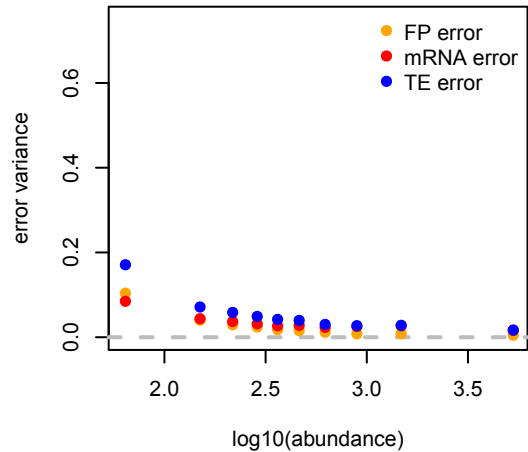**B**

Artieri Hybrid

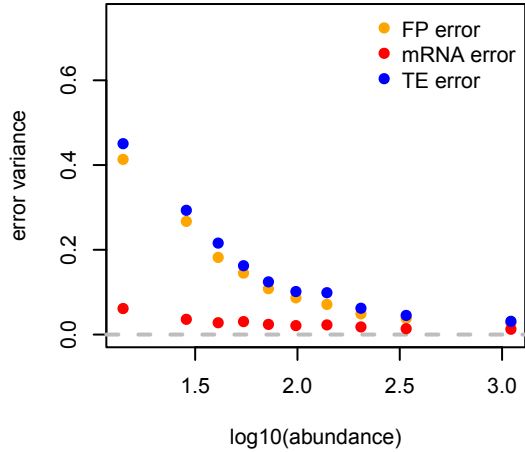**C**

BY / RM Hybrid

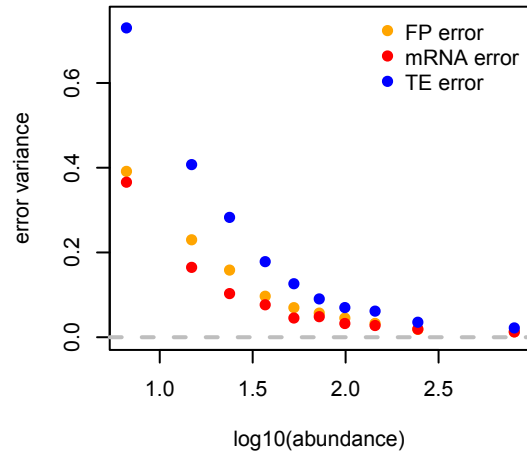

Supplement: pgen.1004692.s005.pdf [file pgen.1004692.s005.pdf]
